# Supplementary material
Source: PubMed Central journal article supplement (PMC10992166)
Supplement: 262_2020_2844_MOESM1_ESM.pdf [file 262_2020_2844_MOESM1_ESM.pdf]

**Supplemental Table 1.** Overview of patient samples, categorized by trial, week of biopsy, and inclusion in experimental group

| Patient ID | TRIAL  | STAGE | AGE  | SEX | WEEK | IHC | RNAseq |
|------------|--------|-------|------|-----|------|-----|--------|
| VMM1026    | MEL 48 | IIIB  | 59   | M   | 0    | Y   | X      |
| VMM1032    | MEL 48 | IIIB  | 60   | M   | 0    | Y   | X      |
| VMM1050    | MEL 48 | IV    | 59   | M   | 0    | Y   | X      |
| VMM1007    | MEL 48 | IIIC  | 47   | M   | 1    | X   | X      |
| VMM1021    | MEL 48 | IIIC  | 60   | M   | 1    | X   | X      |
| VMM1029    | MEL 48 | IIIC  | 51   | M   | 1    | X   | X      |
| VMM1033    | MEL 48 | IIIA  | 27   | M   | 1    | X   | X      |
| VMM1055    | MEL 48 | IIIC  | 48   | F   | 1    | X   | X      |
| VMM1036    | MEL 48 | IV    | 67   | M   | 1    | X   | --     |
| VMM1024    | MEL 48 | IIIB  | 72   | M   | 1    | X   | --     |
| VMM1045    | MEL 48 | IIIB  | 60   | F   | 1    | X   | --     |
| VMM1014    | MEL 48 | IIIB  | 62   | M   | 1    | X   | --     |
| VMM1008    | MEL 48 | IIIC  | 53   | M   | 3    | Y   | X      |
| VMM1023    | MEL 48 | IIIC  | 72   | F   | 3    | Y   | X      |
| VMM1034    | MEL 48 | IIIB  | 31   | F   | 3    | Y   | X      |
| VMM1048    | MEL 48 | IIIC  | 50   | M   | 3    | Y   | X      |
| VMM871     | MEL 48 | IV    | 37   | F   | 7    | X   | --     |
| VMM1010    | MEL 48 | IIB   | 60   | M   | 7    | X   | --     |
| VMM1018    | MEL 48 | IIIA  | 37   | M   | 7    | X   | --     |
| VMM1022    | MEL 48 | IIIC  | 56   | F   | 7    | X   | --     |
| VMM1039    | MEL 48 | IIIA  | 36   | M   | 7    | X   | --     |
| VMM1041    | MEL 48 | IIIB  | 49   | F   | 7    | X   | --     |
| VMM1044    | MEL 48 | IV    | 58   | M   | 7    | X   | --     |
| VMM1106    | MEL 55 | IIIB  | 51   | F   | 1    | X   | X      |
| VMM1106    | MEL 55 |       |      |     | 7    | X   | --     |
| VMM1077    | MEL 55 | IIIB  | 69.5 | M   | 1,7  | X   | X      |
| VMM1078    | MEL 55 | IIIB  | 43   | M   | 1,7  | X   | X      |
| VMM1076    | MEL 55 | IV    | 65   | M   | 1,7  | X   | X      |
| VMM1086    | MEL 55 | IIIC  | 51.8 | M   | 1,7  | X   | X      |
| VMM1089    | MEL 55 | IV    | 59.5 | M   | 1,7  | X   | X      |
| VMM1093    | MEL 55 | IIIB  | 54.6 | M   | 1,7  | X   | X      |
| VMM1095    | MEL 55 | IV    | 51.2 | F   | 1,7  | X   | X      |
| VMM1098    | MEL 55 | IIIB  | 40.7 | F   | 1,7  | X   | X      |
| VMM1112    | MEL 55 | IIIC  | 59.2 | F   | 1,7  | X   | X      |

X = done in this study, Y = done in Scheafer et al

**Supplemental Table 2.** Mean gene expression in normalized counts ( $\pm$  Standard Deviation), categorized by gene, trial, and time point

|               | <b>Control</b>        | <b>Mel 48 Week 1</b>  | <b>Mel 48 Week 3</b>    | <b>Mel 55 Week 1</b> | <b>Mel 55 Week 7</b> |
|---------------|-----------------------|-----------------------|-------------------------|----------------------|----------------------|
| <b>BAFF</b>   | 146.9 ( $\pm$ 20.15)  | 644.5 ( $\pm$ 210.1)  | 3756.2 ( $\pm$ 679.2)   | 1359 ( $\pm$ 1433)   | 442.7 ( $\pm$ 137.3) |
| <b>APRIL</b>  | 279 ( $\pm$ 36.49)    | 483.1 ( $\pm$ 148.1)  | 2222.6 ( $\pm$ 392.3)   | 582.3 ( $\pm$ 289.8) | 420.1 ( $\pm$ 45.04) |
| <b>LIGHT</b>  | 28.19 ( $\pm$ 10.67)  | 99.3 ( $\pm$ 48.0)    | 662.3 (130.0)           | 177.9 ( $\pm$ 96.48) | 120.3 ( $\pm$ 35.49) |
| <b>LTA</b>    | 4.719 ( $\pm$ 2.15)   | 12.2 ( $\pm$ 3.4)     | 98.7 ( $\pm$ 39.3)      | 42.48 ( $\pm$ 40.79) | 20.5 ( $\pm$ 7.41)   |
| <b>LTB</b>    | 51.97 ( $\pm$ 7.26)   | 187.5 ( $\pm$ 62.9)   | 1156.5 ( $\pm$ 449.6)   | 537.8 ( $\pm$ 482.5) | 239.7 ( $\pm$ 106.8) |
| <b>CD20</b>   | 14.84 ( $\pm$ 12.22)  | 26.2 ( $\pm$ 16.1)    | 271.0 ( $\pm$ 165.5)    | 58.26 ( $\pm$ 58.73) | 140.6 ( $\pm$ 107)   |
| <b>CCL2</b>   | 281.2 ( $\pm$ 57.84)  | 1563.5 ( $\pm$ 797.9) | 52443.5 ( $\pm$ 1617.1) | 1537 ( $\pm$ 2195)   | 754.1 ( $\pm$ 388.8) |
| <b>CCL3</b>   | 6.692 ( $\pm$ 3.56)   | 243.8 ( $\pm$ 201.6)  | 1970.6 ( $\pm$ 548.0)   | 50.05 ( $\pm$ 35.64) | 177.3 ( $\pm$ 311.7) |
| <b>CCL4</b>   | 5.963 ( $\pm$ 3.759)  | 154.4 ( $\pm$ 112.8)  | 1821.5 ( $\pm$ 554.6)   | 169.3 ( $\pm$ 250)   | 82.24 ( $\pm$ 54.76) |
| <b>CCL5</b>   | 101.5 ( $\pm$ 42.09)  | 421.6 ( $\pm$ 203.8)  | 4858.5 ( $\pm$ 1958.8)  | 1372 ( $\pm$ 1586)   | 668.9 ( $\pm$ 427.1) |
| <b>CCL8</b>   | 19.71 ( $\pm$ 11.00)  | 160.6 ( $\pm$ 210.0)  | 2423.9 ( $\pm$ 1179.7)  | 886.5 ( $\pm$ 1790)  | 62.04 ( $\pm$ 27.02) |
| <b>CXCL9</b>  | 113.5 ( $\pm$ 40.22)  | 457.4 ( $\pm$ 215.4)  | 25312.3 ( $\pm$ 7466.4) | 4862 ( $\pm$ 8327)   | 681.4 ( $\pm$ 425.6) |
| <b>CXCL10</b> | 49.35 ( $\pm$ 20.21)  | 364.1 ( $\pm$ 424.0)  | 11735.9 ( $\pm$ 3120.6) | 3718 ( $\pm$ 7170)   | 225 ( $\pm$ 147.7)   |
| <b>CXCL11</b> | 19.46 ( $\pm$ 13.16)  | 108.3 ( $\pm$ 111.9)  | 1530.5 ( $\pm$ 403.6)   | 68.1 ( $\pm$ 50.13)  | 1321 ( $\pm$ 2564)   |
| <b>CXCL13</b> | 0.5997 ( $\pm$ 1.039) | 4.3 ( $\pm$ 1.8)      | 532.7 ( $\pm$ 104.3)    | 14.08 ( $\pm$ 15.29) | 39.87 ( $\pm$ 31.64) |
| <b>CCL18</b>  | 83.81 ( $\pm$ 38.26)  | 635.6 ( $\pm$ 289.8)  | 16296.0                 | 517.2 ( $\pm$ 430.1) | 483 ( $\pm$ 159.3)   |
| <b>CCL19</b>  | 296.5 ( $\pm$ 31.35)  | 930.4 ( $\pm$ 247.9)  | 904.2 ( $\pm$ 349.1)    | 1217 ( $\pm$ 908)    | 742 ( $\pm$ 292.9)   |
| <b>CCL21</b>  | 367.1 ( $\pm$ 135.6)  | 865.4 ( $\pm$ 243.9)  | 284.7 ( $\pm$ 87.1)     | 561.2 ( $\pm$ 171.6) | 751.2 ( $\pm$ 248.7) |

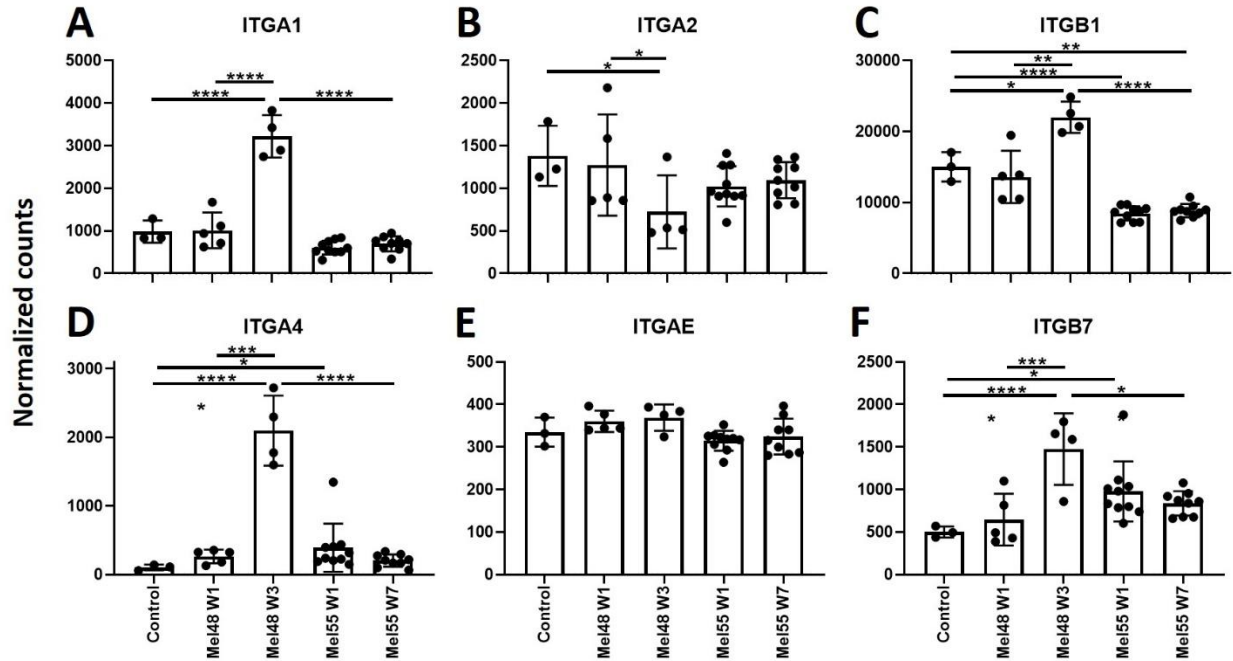

**Supplemental Figure 1.** Expression of individual integrin genes ITGA1 (CD49a) (A), ITGA2 (CD49b) (B), ITGB1 (CD29) (C), ITGA4 (CD49d) (D), ITGAE (CD103) (E), ITGB7 (F). Expression data were obtained from vaccine site biopsies of patients treated with IFA (MEL 48) or AS15 (MEL 55), as well as normal tissue obtained pre-vaccination for control purposes (n=3). For patients treated with IFA, gene expression is shown at week (w) 1 (n=3), and week 3 (n=4), following initial vaccination at a site separate from the biopsied tissue. For patients treated with AS15, gene expression is shown at week 1 (n=10) and week 7 (n=9), following initial vaccination at a distant site. For factors of significance: \*  $p < 0.05$ , \*\*  $p < 0.01$ , \*\*\*  $p < 0.001$ , \*\*\*\*  $p < 0.0001$ ; derived from differential gene expression.

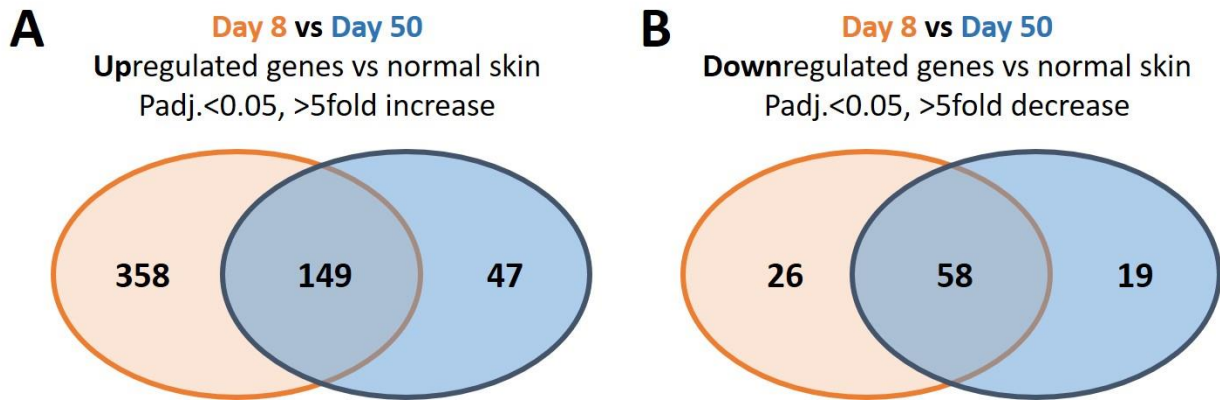

**Supplemental Figure 2.** Differentially upregulated (**A**) or downregulated (**B**) genes in Mel55 VSME compared to normal skin. Differential expression was determined as adjusted P value of less than 0.05 and at least 5-fold change compared to normal skin.

q-Values

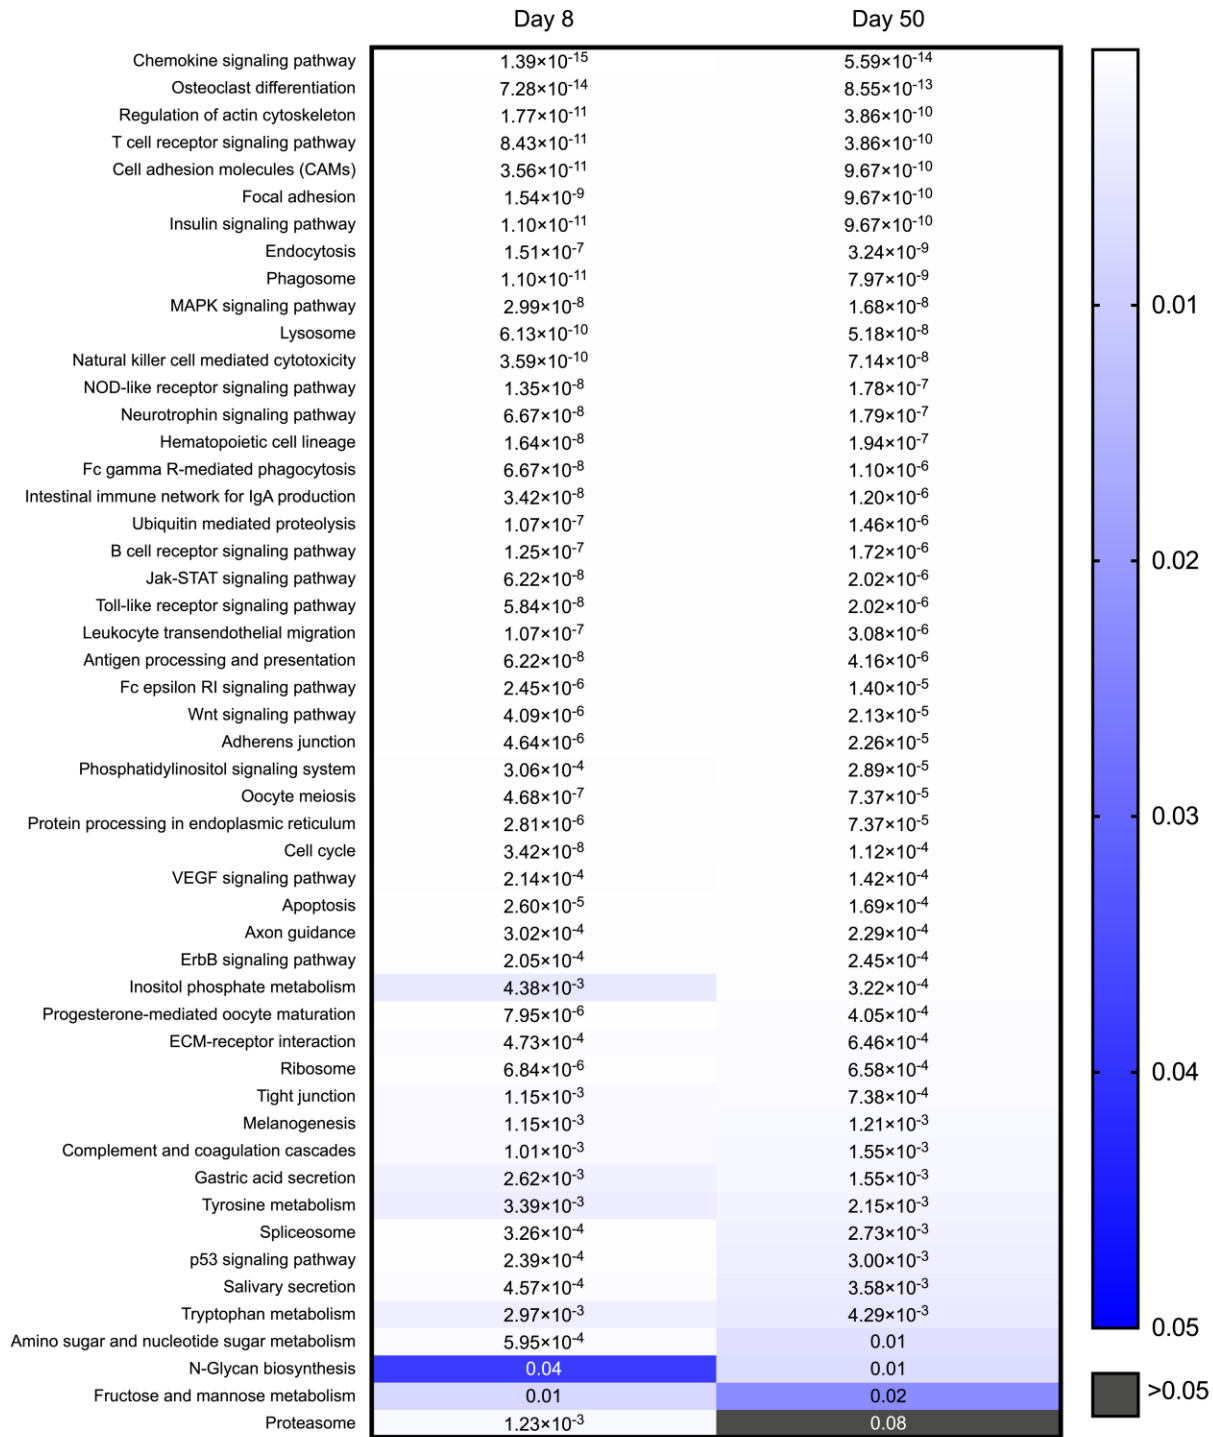

**Supplemental Figure 3.** Differentially expressed pathways in VSME of patients vaccinated with AS15 (Mel155) at day 8 or day 50 after the first vaccine, compared to normal skin. Results were obtained through a GAGE pathway analysis. Q-values are provided for enriched pathways at each time point.
